# Supplementary material for: Effect of Pt doping on the gas sensing properties of porous chromium oxide films through a kinetic response analysis approach
Source: Royal Society of Chemistry journal article supplement (doi:10.1039/c5ra02186c), 2015-01-01
Supplement: c5ra02186c1.pdf [file c5ra02186c1.pdf]

## **Effect of Pt doping on Gas Sensing properties of porous Chromium**

### **Oxide films through Kinetic Response Analysis Approach**

Vinayak B. Kamble\* and Arun M. Umarji

*Materials Research Centre, Indian Institute of Science, Bangalore, India 560012*

*Email: vinbk@mrc.iisc.ernet.in*

**Supplementary Information**

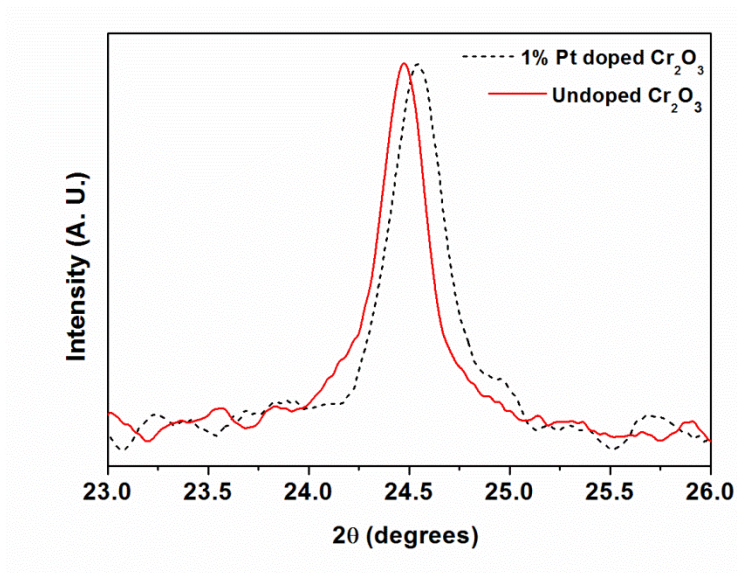

Fig. S1. Comparison of the XRD peak of (012) line in a slow scan mode shows the slight increase in the peak position signifying smaller d spacing.

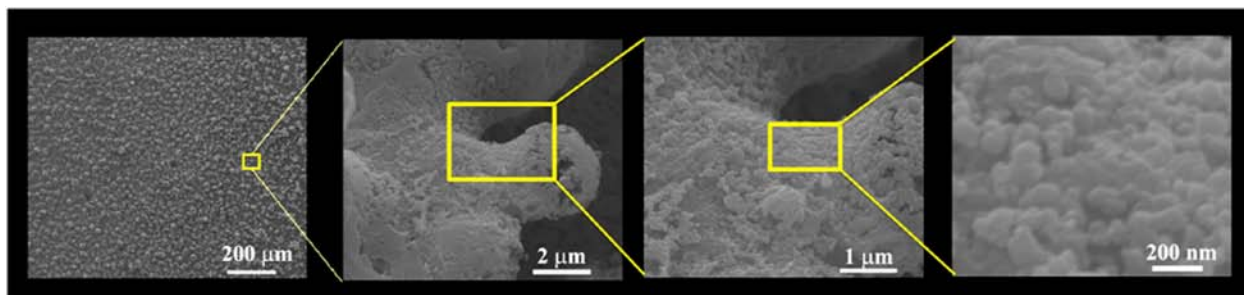

Fig. S2. A set of cascading SEM images showing films particles ( $\sim 2\text{-}3\ \mu\text{m}$ ) being composed of still smaller particles of  $\sim 50\ \text{nm}$  in size.

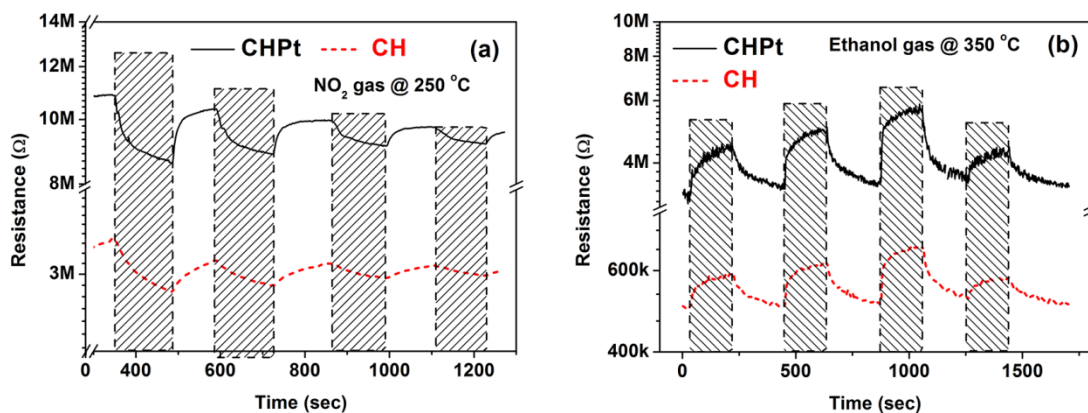

Fig. S3. Typical response transients of CH and CHPt for various concentrations of (a)  $\text{NO}_2$  gas and (b) ethanol vapors.

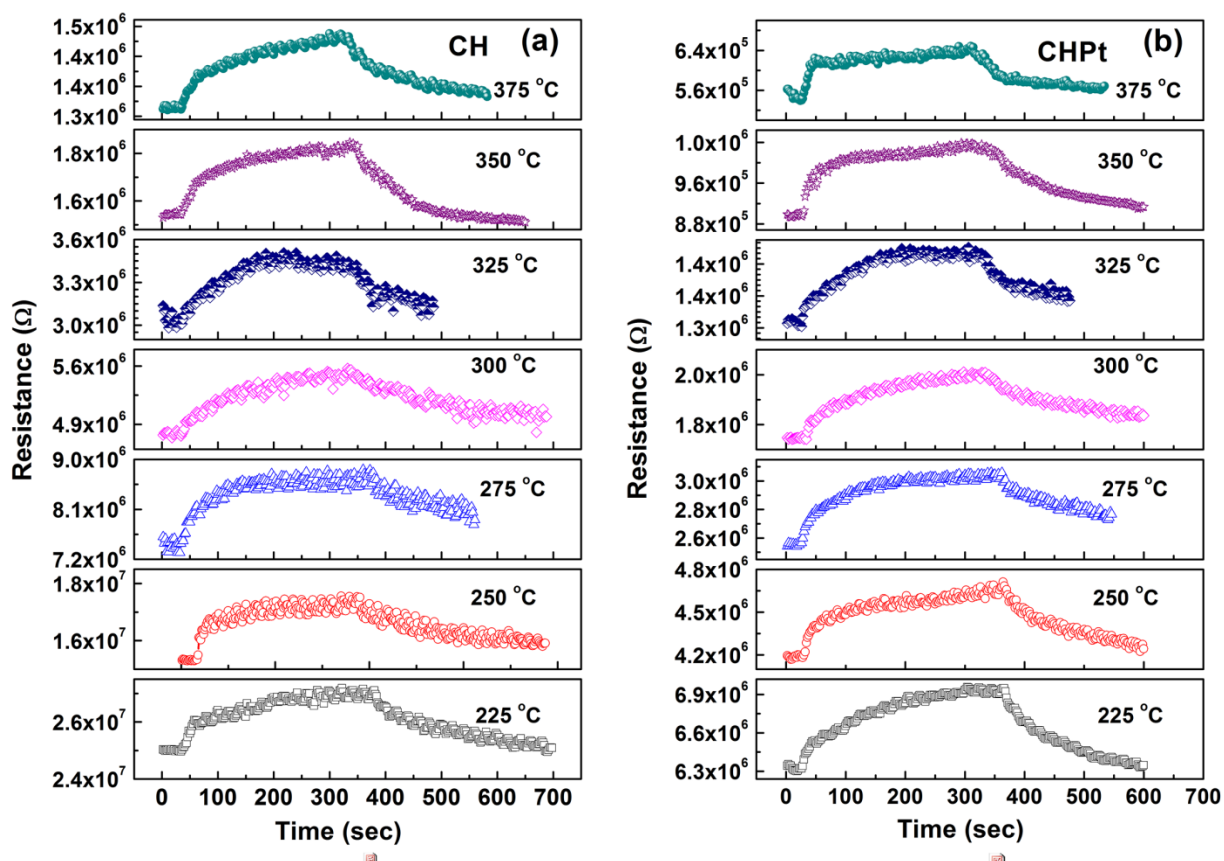

Fig. S4. The typical response transients of (a) CH and (b) CHPt film for 1000 ppm ethanol vapors.
